# Supplementary material
Source: PubMed Central journal article supplement (PMC8250826)
Supplement: IJC-149-820-s001.pdf [file IJC-149-820-s001.pdf]

**Cumulative COVID-19 incidence, mortality, and prognosis in cancer survivors: a population-based study in Reggio Emilia, Northern Italy.**

Lucia Mangone, Francesco Gioia, Pamela Mancuso, Isabella Bisceglia, Marta Ottone, Massimo Vicentini, Carmine Pinto, Paolo Giorgi Rossi.

**Supplementary Table.** Distribution of outcomes by age and cancer diagnosis in cancer population positive for SARS-CoV-2.

|                                 | Positive for SARS-CoV-2 |      | Hospitalization |      | Death |      |
|---------------------------------|-------------------------|------|-----------------|------|-------|------|
|                                 | n                       | %col | n               | %row | n     | %row |
| <b>Cancer diagnosis and age</b> |                         |      |                 |      |       |      |
| <b>Age&lt;70</b>                |                         |      |                 |      |       |      |
| <2 years                        | 26                      | 17.7 | 15              | 57.7 | 5     | 19.2 |
| 2-5 years                       | 45                      | 30.6 | 13              | 28.9 | 2     | 4.4  |
| >5 years                        | 76                      | 51.7 | 22              | 28.9 | 5     | 6.6  |
| <b>Age 70-80</b>                |                         |      |                 |      |       |      |
| <2 years                        | 27                      | 22.3 | 19              | 70.4 | 9     | 33.3 |
| 2-5 years                       | 27                      | 22.3 | 21              | 77.8 | 9     | 33.3 |
| >5 years                        | 67                      | 55.4 | 34              | 50.7 | 16    | 23.9 |
| <b>Age&gt;80</b>                |                         |      |                 |      |       |      |
| <2 years                        | 19                      | 10.6 | 10              | 52.6 | 10    | 52.6 |
| 2-5 years                       | 34                      | 19.0 | 11              | 32.4 | 6     | 17.6 |
| >5 years                        | 126                     | 70.4 | 56              | 44.4 | 51    | 40.5 |
